# Supplementary material for: Diversification of metazoan Kexin-like proprotein convertases: insights from the leech Helobdella
Source: bioRxiv or medRxiv preprint supplement (doi:10.1101/802215), 2019-10-13
Supplement: Supplementary file [file media-1.pdf]

Table S1 List of gene models surveyed in this study

| Species (Database)                        | Gene ID                        | Gene Name    | Label in Figs.2&3 | Gene Family |
|-------------------------------------------|--------------------------------|--------------|-------------------|-------------|
| <i>Saccharomyces cerevisiae</i> (ENSEMBL) | YNL238W                        | <i>KEX2</i>  | Sce-kexin         | Kexin-like  |
|                                           | YCR045C                        | <i>RRT12</i> |                   | PK-like     |
|                                           | YEL060C                        | <i>PRB1</i>  |                   | PK-like     |
|                                           | YOR003W                        | <i>YSP3</i>  |                   | PK-like     |
| <i>Acanthamoeba castellanii</i> (ENSEMBL) | ACA1_057280                    |              |                   | Kexin-like  |
|                                           | ACA1_234230                    |              |                   | Kexin-like  |
|                                           | ACA1_387910                    |              |                   | Kexin-like  |
|                                           | ACA1_264710                    |              |                   | S1P-like    |
|                                           | ACA1_222700                    |              |                   | PK-like     |
|                                           | ACA1_128830                    |              |                   | PK-like     |
|                                           | ACA1_223330                    |              |                   | PK-like     |
|                                           | ACA1_273880                    |              |                   | PK-like     |
|                                           | ACA1_321400                    |              |                   | PK-like     |
|                                           | ACA1_155550                    |              |                   | PK-like     |
|                                           | ACA1_278460                    |              |                   | PK-like     |
|                                           | ACA1_316750                    |              |                   | PK-like     |
|                                           | ACA1_326080                    |              |                   | PK-like     |
| ACA1_149240                               |                                |              | TPPII             |             |
| <i>Capsaspora owczarzaki</i> (ENSEMBL)    | CAOG_004148                    |              | Cow-pcsk          | Kexin-like  |
|                                           | CAOG_005995                    |              |                   | S1P-like    |
|                                           | CAOG_003679                    |              |                   | PK-like     |
|                                           | CAOG_006156                    |              |                   | PK-like     |
|                                           | CAOG_007483                    |              |                   | TPPII       |
| <i>Monosiga brevicollis</i> (ENSEMBL)     | MONBRDRAFT_30798               |              | Mbr-30798         | Kexin-like  |
|                                           | MONBRDRAFT_14515               |              | Mbr-14515         | Kexin-like  |
|                                           | MONBRDRAFT_27758               |              |                   | S1P-like    |
|                                           | MONBRDRAFT_34612               |              |                   | TPPII       |
| <i>Amphimedon queenslandica</i> (ENSEMBL) | Aqu2.1.25568                   |              | Aqu-25568         | Kexin-like  |
|                                           | Aqu2.1.31170                   |              | Aqu-31170         | Kexin-like  |
|                                           | Aqu2.1.28225                   |              | Aqu-28225         | Kexin-like  |
|                                           | Aqu2.1.24525                   |              | Aqu-24525         | Kexin-like  |
|                                           | Aqu2.1.31171                   |              | Aqu-31171         | Kexin-like  |
|                                           | Aqu2.1.23420                   |              | Aqu-23420         | Kexin-like  |
|                                           | Aqu2.1.11050 +<br>Aqu2.1.11051 |              |                   | Kexin-like  |
|                                           | Aqu2.1.05739                   |              |                   | Kexin-like  |
|                                           | Aqu2.1.11049                   |              |                   | Kexin-like  |
|                                           | Aqu2.1.44231                   |              |                   | S1P-like    |
|                                           | Aqu2.1.38120                   |              |                   | PK-like     |
|                                           | Aqu2.1.39723                   |              |                   | PK-like     |
|                                           | Aqu2.1.38118                   |              |                   | PK-like     |
|                                           | Aqu2.1.37599                   |              |                   | PK-like     |
|                                           | Aqu2.1.38117                   |              |                   | PK-like     |
|                                           | Aqu2.1.32598                   |              |                   | PK-like     |

| Species (Database)                              | Gene ID                                            | Gene Name | Label in Figs.2&3 | Gene Family |
|-------------------------------------------------|----------------------------------------------------|-----------|-------------------|-------------|
| <i>Amphimedon queenslandica</i> (ENSEMBL) cont. | Aqu2.1.30105                                       |           |                   | PK-like     |
|                                                 | Aqu2.1.38114                                       |           |                   | PK-like     |
|                                                 | Aqu2.1.38119                                       |           |                   | PK-like     |
|                                                 | Aqu2.1.38116                                       |           |                   | PK-like     |
|                                                 | Aqu2.1.08606 +<br>Aqu2.1.08607                     |           |                   | PK-like     |
|                                                 | Aqu2.1.00245                                       |           |                   | PK-like     |
|                                                 | Aqu2.1.30109                                       |           |                   | PK-like     |
|                                                 | Aqu2.1.38115                                       |           |                   | PK-like     |
|                                                 | Aqu2.1.02987                                       |           |                   | TPPII       |
|                                                 | Aqu2.1.43819                                       |           |                   | TPPII       |
| <i>Mnemiopsis leidyi</i> (ENSEMBL)              | ML11682a                                           |           | Mle-11682         | Kexin-like  |
|                                                 | ML20261a                                           |           | Mle-20261         | Kexin-like  |
|                                                 | ML207912a                                          |           | Mle-207912        | Kexin-like  |
|                                                 | ML07022a                                           |           | Mle-7022          | Kexin-like  |
|                                                 | ML200226a                                          |           | Mle-200226        | Kexin-like  |
|                                                 | ML279823a                                          |           | Mle-279823        | Kexin-like  |
|                                                 | ML009145a                                          |           |                   | S1P-like    |
| <i>Trichoplax adherens</i> (ENSEMBL)            | TriadG60295                                        |           | Tad-60295         | Kexin-like  |
|                                                 | TriadG22925                                        |           | Tad-22925         | Kexin-like  |
|                                                 | TriadG54612                                        |           | Tad-54612         | Kexin-like  |
|                                                 | TriadG19704                                        |           |                   | S1P-like    |
|                                                 | TriadG61672                                        |           |                   | TPPII       |
| <i>Nematostella vectensis</i> (ENSEMBL)         | NEMVEDRAFT_v1g234208                               |           | Nve-234208        | Kexin-like  |
|                                                 | NEMVEDRAFT_v1g348                                  |           | Nve-348           | Kexin-like  |
|                                                 | NEMVEDRAFT_v1g129977                               |           | Nve-129977        | Kexin-like  |
|                                                 | NEMVEDRAFT_v1g161314                               |           | Nve-161314        | Kexin-like  |
|                                                 | NEMVEDRAFT_v1g160244                               |           | Nve-160244        | Kexin-like  |
|                                                 | NEMVEDRAFT_v1g112522                               |           | Nve-112522        | Kexin-like  |
|                                                 | NEMVEDRAFT_v1g168742                               |           | Nve-168742        | Kexin-like  |
|                                                 | NEMVEDRAFT_v1g134107 +<br>NEMVEDRAFT_v1g2207       |           | Nve-184           | Kexin-like  |
|                                                 | NEMVEDRAFT_v1g112587 +<br>NEMVEDRAFT_v1g1125<br>38 |           |                   | Kexin-like  |
|                                                 | NEMVEDRAFT_v1g225607                               |           |                   | S1P-like    |
|                                                 | NEMVEDRAFT_v1g225649                               |           |                   | S1P-like    |
|                                                 | NEMVEDRAFT_v1g225649                               |           |                   | TPPII       |
| <i>Lottia gigantean</i> (ENSEMBL)               | LotgiG106119                                       |           | Lgi-106119        | Kexin-like  |
|                                                 | LotgiG81964                                        |           | Lgi-81964         | Kexin-like  |
|                                                 | LotgiG102960                                       |           | Lgi-102960        | Kexin-like  |
|                                                 | LotgiG212426                                       |           | Lgi-212426        | Kexin-like  |
|                                                 | LotgiG112524                                       |           | Lgi-112524        | Kexin-like  |
|                                                 | LotgiG224835                                       |           | Lgi-224835        | Kexin-like  |
|                                                 | LotgiG123675                                       |           |                   | S1P-like    |
|                                                 | LotgiG129137                                       |           |                   | TPPII       |
| <i>Crassostrea gigas</i> (ENSEMBL)              | CGI_10016370                                       |           | Cgi-34782         | Kexin-like  |

| Species (Database)                       | Gene ID                                    | Gene Name              | Label in Figs.2&3 | Gene Family |
|------------------------------------------|--------------------------------------------|------------------------|-------------------|-------------|
| <i>Crassostrea gigas</i> (ENSEMBL) cont. | CGI_10003367                               |                        | Cgi-26985         | Kexin-like  |
|                                          | CGI_10003191                               |                        | Cgi-21858         | Kexin-like  |
|                                          | CGI_10019653                               |                        | Cgi-23284         | Kexin-like  |
|                                          | CGI_10022584                               |                        | Cgi-35453         | Kexin-like  |
|                                          | CGI_10027463                               |                        | Cgi-29248         | Kexin-like  |
|                                          | CGI_10013398                               |                        | Cgi-25267         | Kexin-like  |
|                                          | CGI_10004432                               |                        |                   | Kexin-like  |
|                                          | CGI_10009470                               |                        |                   | S1P-like    |
|                                          | CGI_10005825                               |                        |                   | TPPII       |
| <i>Octopus bimaculoides</i> (ENSEMBL)    | Ocbimv22002644m.g                          |                        | Obi-02644         | Kexin-like  |
|                                          | Ocbimv22020256m.g                          |                        | Obi-20256         | Kexin-like  |
|                                          | Ocbimv22016958m.g                          |                        | Obi-16958         | Kexin-like  |
|                                          | Ocbimv22028944m.g                          |                        | Obi-28944         | Kexin-like  |
|                                          | Ocbimv22033366m.g                          |                        |                   | Kexin-like  |
|                                          | Ocbimv22014564m.g                          |                        |                   | S1P-like    |
|                                          | Ocbimv22020590m.g                          |                        |                   | TPPII       |
| <i>Capitella teleta</i> (ENSEMBL)        | CapteG52595                                |                        | Cte-52595         | Kexin-like  |
|                                          | CapteG161485                               |                        | Cte-161485        | Kexin-like  |
|                                          | CapteG153069                               |                        | Cte-153069        | Kexin-like  |
|                                          | CapteG121853                               |                        | Cte-121853        | Kexin-like  |
|                                          | CapteG194857                               |                        | Cte-194857        | Kexin-like  |
|                                          | CapteG177803                               |                        | Cte-177803        | Kexin-like  |
|                                          | CapteG228241                               |                        |                   | S1P-like    |
|                                          | CapteG217313                               |                        |                   | PK-like     |
|                                          | CapteG169944                               |                        |                   | PK-like     |
|                                          | CapteG220467                               |                        |                   | PK-like     |
|                                          | CapteG54371                                |                        |                   | PK-like     |
|                                          | CapteG127412                               |                        |                   | PK-like     |
|                                          | CapteG54339                                |                        |                   | PK-like     |
|                                          | CapteG83747                                |                        |                   | PK-like     |
|                                          | CapteG121340                               |                        |                   | PK-like     |
|                                          | CapteG61455                                |                        |                   | PK-like     |
|                                          | CapteG184079                               |                        |                   | PK-like     |
|                                          | CapteG163820                               |                        |                   | PK-like     |
|                                          | CapteG217316                               |                        |                   | PK-like     |
|                                          | CapteG228048                               |                        |                   | TPPII       |
| <i>Helobdella robusta</i> (ENSEMBL)      | HelroG193616                               | <i>Hro-pcsk1</i>       | Hro-PCSK1         | Kexin-like  |
|                                          | HelroG96355                                | <i>Hro-pcsk2</i>       | Hro-PCSK2         | Kexin-like  |
|                                          | HelroG84740                                | <i>Hro-furin1.1</i>    | Hro-furin1.1      | Kexin-like  |
|                                          | HelroG170307                               | <i>Hro-furin1.2</i>    | Hro-furin1.2      | Kexin-like  |
|                                          | HelroG107946                               | <i>Hro-furin1.3</i>    | Hro-furin1.3      | Kexin-like  |
|                                          | HelroG82350                                | <i>Hro-furin1.4</i>    | Hro-furin1.4      | Kexin-like  |
|                                          | HelroG105284                               | <i>Hro-furin1.5</i>    | Hro-furin1.5      | Kexin-like  |
|                                          | HelroG190143 +<br>HelroG93024              | <i>Hro-furin1.6</i>    | Hro-furin1.6      | Kexin-like  |
|                                          | HelroG72480                                | <i>Hro-furin1.7</i>    | Hro-furin1.7      | Kexin-like  |
|                                          | HelroG74170 + Helro149650<br>+ Helro137839 | <i>Hro-furin2-like</i> | Hro-furin2-like   | Kexin-like  |

| Species (Database)                        | Gene ID                   | Gene Name        | Label in Figs.2&3 | Gene Family |
|-------------------------------------------|---------------------------|------------------|-------------------|-------------|
| <i>Helobdella robusta</i> (ENSEMBL) cont. | HelroG81814 + Helro184031 | <i>Hro-pcsk7</i> | Hro-PCSK7         | Kexin-like  |
|                                           | HelroG82977               | <i>Hro-pcskx</i> | Hro-PCSKX         | Kexin-like  |
|                                           | HelroG194246              |                  |                   | S1P-like    |
|                                           | HelroG107485              |                  |                   | TPPII       |
| <i>Lingula anatine</i> (ENSEMBL)          | g1247                     |                  | Lan-1247          | Kexin-like  |
|                                           | g33407                    |                  | Lan-33407         | Kexin-like  |
|                                           | g4306                     |                  | Lan-4306          | Kexin-like  |
|                                           | g15382                    |                  | Lan-15382         | Kexin-like  |
|                                           | g404                      |                  | Lan-404           | Kexin-like  |
|                                           | g15960                    |                  | Lan-15960         | Kexin-like  |
|                                           | g6253                     |                  | Lan-6253          | Kexin-like  |
|                                           | g405                      |                  | Lan-405           | Kexin-like  |
|                                           | g1500                     |                  | Lan-1500          | Kexin-like  |
|                                           | g27514                    |                  | Lan-27514         | Kexin-like  |
|                                           | g8872                     |                  | Lan-8872          | Kexin-like  |
|                                           | g25567                    |                  | Lan-25567         | Kexin-like  |
|                                           | g4660 + g4661             |                  |                   | Kexin-like  |
|                                           | g24092 + g24091           |                  |                   | Kexin-like  |
|                                           | g2559 + g2560             |                  |                   | Kexin-like  |
|                                           | g26156                    |                  |                   | Kexin-like  |
|                                           | g11440                    |                  |                   | Kexin-like  |
|                                           | g31800                    |                  |                   | S1P-like    |
|                                           | g8392                     |                  |                   | S1P-like    |
|                                           | g6563 + g6562             |                  |                   | S1P-like    |
|                                           | g20349                    |                  |                   | PK-like     |
|                                           | g19508                    |                  |                   | PK-like     |
|                                           | g20348                    |                  |                   | PK-like     |
|                                           | g33287                    |                  |                   | PK-like     |
|                                           | g10243                    |                  |                   | PK-like     |
|                                           | g11146                    |                  |                   | PK-like     |
|                                           | g11147                    |                  |                   | PK-like     |
|                                           | g14553                    |                  |                   | PK-like     |
|                                           | g10176                    |                  |                   | PK-like     |
|                                           | g14555                    |                  |                   | PK-like     |
|                                           | g14554                    |                  |                   | PK-like     |
|                                           | g19487                    |                  |                   | PK-like     |
|                                           | g17482                    |                  |                   | PK-like     |
|                                           | g12444                    |                  |                   | PK-like     |
|                                           | g22139                    |                  |                   | PK-like     |
|                                           | g26421                    |                  |                   | PK-like     |
| g33111                                    |                           |                  | PK-like           |             |
| g10242                                    |                           |                  | PK-like           |             |
| g10384                                    |                           |                  | PK-like           |             |
| g13429                                    |                           |                  | PK-like           |             |
| g32391                                    |                           |                  | PK-like           |             |
| g10239                                    |                           |                  | PK-like           |             |
| g10385                                    |                           |                  | PK-like           |             |
| g12204                                    |                           |                  | PK-like           |             |

| Species (Database)                      | Gene ID                       | Gene Name         | Label in Figs.2&3 | Gene Family |
|-----------------------------------------|-------------------------------|-------------------|-------------------|-------------|
| <i>Lingula anatine</i> (ENSEMBL) cont.  | g22137                        |                   |                   | PK-like     |
|                                         | g16160                        |                   |                   | PK-like     |
|                                         | g19488                        |                   |                   | PK-like     |
|                                         | g32390                        |                   |                   | PK-like     |
|                                         | g10241                        |                   |                   | PK-like     |
|                                         | g31346                        |                   |                   | PK-like     |
|                                         | g13431                        |                   |                   | PK-like     |
|                                         | g12443                        |                   |                   | PK-like     |
|                                         | g12202                        |                   |                   | PK-like     |
|                                         | g12201                        |                   |                   | PK-like     |
|                                         | g16771                        |                   |                   | PK-like     |
|                                         | g19485                        |                   |                   | PK-like     |
|                                         | g5629                         |                   |                   | PK-like     |
|                                         | g3976                         |                   |                   | PK-like     |
|                                         | g755                          |                   |                   | PK-like     |
|                                         | g31345                        |                   |                   | PK-like     |
|                                         | g3977                         |                   |                   | PK-like     |
|                                         | g22552                        |                   |                   | PK-like     |
|                                         | g4081                         |                   |                   | PK-like     |
|                                         | g22549                        |                   |                   | PK-like     |
|                                         | g10565                        |                   |                   | PK-like     |
|                                         | g15680                        |                   |                   | PK-like     |
|                                         | g5630                         |                   |                   | PK-like     |
|                                         | g31844                        |                   |                   | PK-like     |
|                                         | g26421                        |                   |                   | PK-like     |
|                                         | g29291                        |                   |                   | PK-like     |
|                                         | g31805                        |                   |                   | PK-like     |
|                                         | g19878                        |                   |                   | TPPII       |
|                                         | g30441                        |                   |                   | TPPII       |
|                                         | <i>Adineta vaga</i> (ENSEMBL) | GSADVT00036980001 |                   | Ava-36980   |
| GSADVT00007527001                       |                               |                   | Ava-07527         | Kexin-like  |
| GSADVT00040037001                       |                               |                   | Ava-40037         | Kexin-like  |
| GSADVT00045121001                       |                               |                   | Ava-45121         | Kexin-like  |
| GSADVT00031184001                       |                               |                   | Ava-31184         | Kexin-like  |
| GSADVT00040267001                       |                               |                   | Ava-40267         | Kexin-like  |
| GSADVT00059080001                       |                               |                   | Ava-59080         | Kexin-like  |
| GSADVT00030251001                       |                               |                   | Ava-30251         | Kexin-like  |
| GSADVT00046357001                       |                               |                   | Ava-46357         | Kexin-like  |
| GSADVT00002479001                       |                               |                   | Ava-02479         | Kexin-like  |
| GSADVT00004015001                       |                               |                   | Ava-04015         | Kexin-like  |
| GSADVT00048266001                       |                               |                   | Ava-48266         | Kexin-like  |
| GSADVT00019939001                       |                               |                   | Ava-19939         | Kexin-like  |
| GSADVT00030411001                       |                               |                   | Ava-30411         | Kexin-like  |
| GSADVT00046798001                       |                               |                   | Ava-46798         | Kexin-like  |
| GSADVT00039465001                       |                               |                   | Ava-39465         | Kexin-like  |
| GSADVT00017404001 +<br>GSADVT0001740300 |                               |                   |                   | Kexin-like  |
| GSADVT00058030001                       |                               |                   |                   | Kexin-like  |
| GSADVT00049407001                       |                               |                   | Kexin-like        |             |

| Species (Database)                             | Gene ID                             | Gene Name  | Label in Figs.2&3 | Gene Family |
|------------------------------------------------|-------------------------------------|------------|-------------------|-------------|
| <i>Adineta vaga</i> (ENSEMBL) cont.            | GSADVT00039914001                   |            |                   | S1P-like    |
|                                                | GSADVT00018118001                   |            |                   | S1P-like    |
|                                                | GSADVT00006009001                   |            |                   | TPPII       |
|                                                | GSADVT00061992001                   |            |                   | TPPII       |
| <i>Drosophila melanogaster</i> (ENSEMBL)       | amon                                | amon       | Dme-amon          | Kexin-like  |
|                                                | Fur1                                | furin1     | Dme-furin1        | Kexin-like  |
|                                                | Fur2                                | furin2     | Dme-furin2        | Kexin-like  |
|                                                | S1P                                 | S1P        |                   | S1P-like    |
|                                                | TppII                               | TppII      |                   | TPPII       |
| <i>Tribolium castaneum</i> (ENSEMBL)           | TC004402                            |            | Tca-pcsk1         | Kexin-like  |
|                                                | TC009181                            |            | Tca-pcsk2         | Kexin-like  |
|                                                | TC010869                            |            | Tca-furin1        | Kexin-like  |
|                                                | TC031960                            |            | Tca-furin2        | Kexin-like  |
|                                                | TC002816                            |            |                   | S1P-like    |
|                                                | TC034512                            |            |                   | TPPII       |
| <i>Daphnia pulex</i> (ENSEMBL)                 | DAPPUDRAFT_59868                    |            | Dpu-59868         | Kexin-like  |
|                                                | DAPPUDRAFT_126713                   |            | Dpu-126713        | Kexin-like  |
|                                                | DAPPUDRAFT_43136                    |            | Dpu-43136         | Kexin-like  |
|                                                | DAPPUDRAFT_193075                   |            | Dpu-193075        | Kexin-like  |
|                                                | DAPPUDRAFT_306271                   |            | Dpu-306271        | Kexin-like  |
|                                                | DAPPUDRAFT_306585                   |            | Dpu-306585        | Kexin-like  |
|                                                | DAPPUDRAFT_310948                   |            |                   | S1P-like    |
|                                                | DAPPUDRAFT_186919                   |            |                   | TPPII       |
| <i>Caenorhabditis elegans</i> (ENSEMBL)        | aex-5                               | aex-5      | Cel-aex5          | Kexin-like  |
|                                                | egl-3                               | egl-3      | Cel-pcsk2         | Kexin-like  |
|                                                | kpc-1                               | kpc-1      | Cel-kpc1          | Kexin-like  |
|                                                | bli-4                               | bli-4      | Cel-bli4          | Kexin-like  |
|                                                | tpp-2                               | tpp-2      |                   | TPPII       |
| <i>Strongylocentrotus purpuratus</i> (ENSEMBL) | SP-NEC2_1                           | SP-NEC2_1  | Spu-027781        | Kexin-like  |
|                                                | SP-FURIN1                           | SP-FURIN1  | Spu-010722        | Kexin-like  |
|                                                | SP-FURIN                            | SP-FURIN   | Spu-002615        | Kexin-like  |
|                                                | SP-NEC2                             | SP-NEC2    | Spu-023813        | Kexin-like  |
|                                                | SP-FURIN_1                          | SP-FURIN_1 | Spu-028030        | Kexin-like  |
|                                                | SP-PCSK7                            | SP-PCSK7   |                   | Kexin-like  |
|                                                | SP-FURIN_2                          | SP-FURIN_2 |                   | Kexin-like  |
|                                                | SP-MBTSP1                           | SP-MBTSP1  |                   | S1P-like    |
|                                                | SP-ASP_8                            |            |                   | PK-like     |
|                                                | SP-SLSP_3 / SP-ASPL_2               |            |                   | PK-like     |
|                                                | SP-HYPP_305                         |            |                   | PK-like     |
|                                                | SP-ASP_12                           |            |                   | PK-like     |
|                                                | SP-ASP_16 / SPU_014264 / SP-SLSP_10 |            |                   | PK-like     |
|                                                | SP-HYPP_1141                        |            |                   | PK-like     |
|                                                | SP-SLSP_26                          |            |                   | PK-like     |
| SP-ASP-4                                       |                                     |            | PK-like           |             |

| Species (Database)                                   | Gene ID                          | Gene Name | Label in Figs.2&3 | Gene Family |
|------------------------------------------------------|----------------------------------|-----------|-------------------|-------------|
| <i>Strongylocentrotus purpuratus</i> (ENSEMBL) cont. | SP-SLSP_27                       |           |                   | PK-like     |
|                                                      | SP-ASP_7 / SP-SLSP_17            |           |                   | PK-like     |
|                                                      | SP-ASP                           |           |                   | PK-like     |
|                                                      | SP-ASP-3                         |           |                   | PK-like     |
|                                                      | SP-ASP_11                        |           |                   | PK-like     |
|                                                      | SP-SLSP_18                       |           |                   | PK-like     |
|                                                      | SP-SLSP_12                       |           |                   | PK-like     |
|                                                      | SP-SLSP_25 / SP-ASP-6 / SP-ASP-5 |           |                   | PK-like     |
|                                                      | SP-SERP                          |           |                   | PK-like     |
|                                                      | SP-SLSP_13                       |           |                   | PK-like     |
|                                                      | SP-SLSP_20                       |           |                   | PK-like     |
|                                                      | SP-SLSP_8                        |           |                   | PK-like     |
|                                                      | SP-SERP-2                        |           |                   | PK-like     |
|                                                      | SP-SLSP_4                        |           |                   | PK-like     |
|                                                      | SP-ASP_14                        |           |                   | PK-like     |
|                                                      | SP-SLSP_14                       |           |                   | PK-like     |
|                                                      | SP-SLSP_15                       |           |                   | PK-like     |
|                                                      | SP-SLSP_21                       |           |                   | PK-like     |
|                                                      | SP-SLSP_22                       |           |                   | PK-like     |
|                                                      | SP-SERP-3                        |           |                   | PK-like     |
|                                                      | SP-SLSP_24                       |           |                   | PK-like     |
|                                                      | SP-SLSP_6                        |           |                   | PK-like     |
|                                                      | SPU_025143 / SPU_009043          |           |                   | PK-like     |
|                                                      | SP-SLSP_1                        |           |                   | PK-like     |
|                                                      | SP-SLSP_11                       |           |                   | PK-like     |
|                                                      | SP-ASP_13 / SP-ASP_15            |           |                   | PK-like     |
|                                                      | SP-ASP_10                        |           |                   | PK-like     |
|                                                      | SP-SLSP_7                        |           |                   | PK-like     |
|                                                      | SP-PPCL                          |           |                   | PK-like     |
|                                                      | SP-ASP_9                         |           |                   | PK-like     |
|                                                      | SP-ASP-2                         |           |                   | PK-like     |
|                                                      | SP-ASP_17                        |           |                   | PK-like     |
|                                                      | SP-SLSP_5                        |           |                   | PK-like     |
|                                                      | SP-SLSP                          |           |                   | PK-like     |
|                                                      | SP-SLSP_9                        |           |                   | PK-like     |
|                                                      | SP-SLSP_16                       |           |                   | PK-like     |
|                                                      | SP-ASP_1                         |           |                   | PK-like     |
|                                                      | SP-SLSP_2                        |           |                   | PK-like     |
|                                                      | SPU_003191                       |           |                   | PK-like     |
|                                                      | SPU_018846                       |           |                   | PK-like     |
|                                                      | SPU_025576                       |           |                   | PK-like     |
|                                                      | SP-SLSP_19                       |           |                   | PK-like     |
|                                                      | SP-PCSK9L                        |           |                   | PK-like     |
| SP-ASPL_1                                            |                                  |           | PK-like           |             |
| SPU_015237                                           |                                  |           | PK-like           |             |
| SPU_003192                                           |                                  |           | PK-like           |             |
| SP-HYPP_3123                                         |                                  |           | PK-like           |             |
| SP-SLSP_23                                           |                                  |           | PK-like           |             |
| SPU_025326                                           |                                  |           | PK-like           |             |

| Species (Database)                                   | Gene ID               | Gene Name | Label in Figs.2&3 | Gene Family |
|------------------------------------------------------|-----------------------|-----------|-------------------|-------------|
| <i>Strongylocentrotus purpuratus</i> (ENSEMBL) cont. | SPU_027076            |           |                   | PK-like     |
|                                                      | SPU_022967            |           |                   | PK-like     |
|                                                      | SPU_014673            |           |                   | PK-like     |
|                                                      | SP-ALLGIF1            |           |                   | PK-like     |
|                                                      | SP-SLSPL / SPU_012623 |           |                   | PK-like     |
|                                                      | SP-TPP2               |           |                   | TPPII       |
| <i>Branchiostoma floridae</i> (JGI)                  | Braf84610             |           | Bfl-84610         | Kexin-like  |
|                                                      | Braf98086             |           | Bfl-98086         | Kexin-like  |
|                                                      | Braf66271             |           | Bfl-66271         | Kexin-like  |
|                                                      | Braf75530             |           | Bfl-75530         | Kexin-like  |
|                                                      | Braf98844             |           | Bfl-98844         | Kexin-like  |
|                                                      | Braf105744            |           | Bfl-105744        | Kexin-like  |
|                                                      | Braf119857            |           | Bfl-119857        | Kexin-like  |
|                                                      | Braf1121298           |           | Bfl-1121298       | Kexin-like  |
|                                                      | Braf123943            |           | Bfl-123943        | Kexin-like  |
|                                                      | Braf165115            |           | Bfl-165115        | Kexin-like  |
|                                                      | Braf1165859           |           | Bfl-1165859       | Kexin-like  |
|                                                      | Braf166302            |           | Bfl-166302        | Kexin-like  |
|                                                      | Braf174236            |           | Bfl-174236        | Kexin-like  |
|                                                      | Braf85770             |           | Bfl-85770         | Kexin-like  |
|                                                      | Braf91496             |           | Bfl-91496         | Kexin-like  |
|                                                      | Braf124316            |           | Bfl-124316        | Kexin-like  |
|                                                      | Braf144492            |           | Bfl-144492        | Kexin-like  |
|                                                      | Braf254769            |           | Bfl-254769        | Kexin-like  |
|                                                      | Braf65099             |           |                   | S1P-like    |
|                                                      | Braf81022             |           |                   | PK-like     |
|                                                      | Braf102644            |           |                   | PK-like     |
|                                                      | Braf129459            |           |                   | PK-like     |
|                                                      | Braf118415            |           |                   | PK-like     |
|                                                      | Braf130739            |           |                   | PK-like     |
|                                                      | Braf107715            |           |                   | PK-like     |
|                                                      | Braf265827            |           |                   | PK-like     |
|                                                      | Braf131810            |           |                   | PK-like     |
|                                                      | Braf130113            |           |                   | PK-like     |
|                                                      | Braf121465            |           |                   | PK-like     |
|                                                      | Braf121466            |           |                   | PK-like     |
|                                                      | Braf119698            |           |                   | TPPII       |
|                                                      | Braf119705            |           |                   | TPPII       |
| <i>Ciona intestinalis</i> (ENSEMBL)                  | ENSCING00000006411    |           | Cin-219063        | Kexin-like  |
|                                                      | ENSCINT00000012624    |           | Cin-294743        | Kexin-like  |
|                                                      | ENSCINT00000011797    |           | Cin-292557        | Kexin-like  |
|                                                      | ENSCINT00000010394    |           | Cin-248784        | Kexin-like  |
|                                                      | ENSCINT00000012580    |           | Cin-270411        | Kexin-like  |
|                                                      | ENSCINT00000035891    |           |                   | S1P-like    |
|                                                      | ENSCINT00000016248    |           |                   | TPPII       |
| <i>Petromyzon marinus</i> (ENSEMBL)                  | ENSPMAT00000009791    |           |                   | Kexin-like  |



| Species (Database)                        | Gene ID            | Gene Name | Label in Figs.2&3 | Gene Family |
|-------------------------------------------|--------------------|-----------|-------------------|-------------|
| <i>Petromyzon marinus</i> (ENSEMBL) cont. | ENSPMAT00000009884 |           |                   | Kexin-like  |
|                                           | ENSPMAT00000009883 |           |                   | Kexin-like  |
|                                           | ENSPMAT00000001746 |           |                   | Kexin-like  |
|                                           | ENSPMAT00000001849 |           |                   | S1P-like    |
| <i>Danio rerio</i> (ENSEMBL)              | pcsk1              | pcsk1     |                   | Kexin-like  |
|                                           | pcsk2              | pcsk2     |                   | Kexin-like  |
|                                           | furinA             | furinA    |                   | Kexin-like  |
|                                           | furinB             | furinB    |                   | Kexin-like  |
|                                           | pcsk5a             | pcsk5a    |                   | Kexin-like  |
|                                           | pcsk5b             | pcsk5b    |                   | Kexin-like  |
|                                           | pcsk6              | pcsk6     |                   | Kexin-like  |
|                                           | pcsk7              | pcsk7     |                   | Kexin-like  |
|                                           | mbtps1             | mbtps1    |                   | S1P-like    |
|                                           | pcsk9              | pcsk9     |                   | PK-like     |
| tpp2                                      | tpp2               |           | TPPII             |             |
| <i>Xenopus tropicalis</i> (ENSEMBL)       | pcsk1              | pcsk1     | Xtr-pcsk1         | Kexin-like  |
|                                           | pcsk2              | pcsk2     | Xtr-pcsk2         | Kexin-like  |
|                                           | furin              | furin     | Xtr-furin         | Kexin-like  |
|                                           | pcsk4              | pcsk4     | Xtr-pcsk4         | Kexin-like  |
|                                           | pcsk5              | pcsk5     | Xtr-pcsk5         | Kexin-like  |
|                                           | pcsk6              | pcsk6     | Xtr-pcsk6         | Kexin-like  |
|                                           | pcsk7              | pcsk7     | Xtr-pcsk7         | Kexin-like  |
|                                           | mbtps1             | mbtps1    |                   | S1P-like    |
|                                           | pcsk9              | pcsk9     |                   | PK-like     |
|                                           | tpp2               | tpp2      |                   | TPPII       |
| <i>Gallus gallus</i> (ENSEMBL)            | PCSK1              | PCSK1     | Gga-pcsk1         | Kexin-like  |
|                                           | PCSK2              | PCSK2     | Gga-pcsk2         | Kexin-like  |
|                                           | FURIN              | FURIN     | Gga-furin         | Kexin-like  |
|                                           | PCSK4              | PCSK4     | Gga-pcsk4         | Kexin-like  |
|                                           | PCSK5              | PCSK5     | Gga-pcsk5         | Kexin-like  |
|                                           | PCSK6              | PCSK6     | Gga-pcsk6         | Kexin-like  |
|                                           | PCSK7              | PCSK7     | Gga-pcsk7         | Kexin-like  |
|                                           | MBTPS1             | MBTPS1    |                   | S1P-like    |
|                                           | TPP2               | TPP2      |                   | TPPII       |
| <i>Homo sapiens</i> (ENSEMBL)             | PCSK1              | PCSK1     | Hsa-pcsk1         | Kexin-like  |
|                                           | PCSK2              | PCSK2     | Hsa-pcsk2         | Kexin-like  |
|                                           | FURIN              | FURIN     | Hsa-furin         | Kexin-like  |
|                                           | PCSK4              | PCSK4     | Hsa-pcsk4         | Kexin-like  |
|                                           | PCSK5              | PCSK5     | Hsa-pcsk5         | Kexin-like  |
|                                           | PCSK6              | PCSK6     | Hsa-pcsk6         | Kexin-like  |
|                                           | PCSK7              | PCSK7     | Hsa-pcsk7         | Kexin-like  |
|                                           | MBTPS1             | MBTPS1    |                   | S1P-like    |
|                                           | PCSK9              | PCSK9     |                   | PK-like     |
|                                           | TPP2               | TPP2      |                   | TPPII       |

Table S2. PCR primers used to amplify cDNA fragments of the 12 *Helobdella austinensis* kexin-like convertase

| Primer IDs              | Sequence (5' to 3')               |
|-------------------------|-----------------------------------|
| Hau-pcsk1 forward       | 5'-TGGACGAGGTGTCGTCGTCA-3'        |
| Hau-pcsk1 reverse       | 5'-GGATGTTCTGTGTCTTTGCA-3'        |
| Hau-pcsk2 forward       | 5'-CTTCGAACACAAACTCGTTCA-3'       |
| Hau-pcsk2 reverse       | 5'-TCAAAACTCGCTAAACTTCCT-3'       |
| Hau-furin1.1 forward    | 5'-CCGTCCAAATTGAGGGAGGAA-3'       |
| Hau-furin1.1 reverse    | 5'-CATGAAAGCCCAGTTGGTGA-3'        |
| Hau-furin1.2 forward    | 5'-CGCGAAATACATAGCGGAAA-3'        |
| Hau-furin1.2 reverse    | 5'-CAATTGGTGAAACCCTCGTT-3'        |
| Hau-furin1.3 forward    | 5'-CAGATCGACGGCAATGAAACAGT-3'     |
| Hau-furin1.3 reverse    | 5'-GCGCACATGCAAACTATCT-3'         |
| Hau-furin1.4 forward    | 5'-GCGAAAGAAGTTGCCAGGGA-3'        |
| Hau-furin1.4 reverse    | 5'-CGTCGTCATGAAAGTCCAGT-3'        |
| Hau-furin1.5 forward    | 5'-AGATCGCTTTCAAGCAACAGTTATCA-3'  |
| Hau-furin1.5 reverse    | 5'-TCAAAATCGTCTTTGGCAAT-3'        |
| Hau-furin1.6 forward    | 5'-CAGTCTGGTACAGGCATTCCTATTGGT-3' |
| Hau-furin1.6 reverse    | 5'-CAAGACATCATTCATGGTAATGA-3'     |
| Hau-furin1.7 forward    | 5'-GTACAGAAATGAATGGGCAGT-3'       |
| Hau-furin1.7 reverse    | 5'-CCATTCATTGAAACCTTCGTT-3'       |
| Hau-furin2-like forward | 5'-GGCAGTGGAATTGAGGGTGGT-3'       |
| Hau-furin2-like reverse | 5'-CTTCCAGGTACCTCTGGGAT-3'        |
| Hau-pcsk7 forward       | 5'-CATAACATCACTGGCAGGGGCA-3'      |
| Hau-pcsk7 reverse       | 5'-GAAGGTATCGTAGAGTGCCAT-3'       |
| Hau-pcskx forward       | 5'-CGGCCTGGGTCAAAGGTTACA-3'       |
| Hau-pcskx reverse       | 5'-GATGGATTCTCACCCAGCT-3'         |

Table S3. PCR primers for building constructs and performing site-direct mutagenesis

| Construct<br>Primer IDs                           | Sequence (5' to 3')                                             |
|---------------------------------------------------|-----------------------------------------------------------------|
| pCS107 Hau-bmp5-8 <sub>CSM</sub>                  |                                                                 |
| Hau-bmp5-8 cleavage site 1 mutagenesis forward    | 5'-GCCGACATAAGAAACCTCGGA-3'                                     |
| Hau-bmp5-8 cleavage site 1 mutagenesis reverse    | 5'-AGATC <u>CTTTCTTTCC</u> CTCACTCAACTGA-3'                     |
| Hau-bmp5-8 cleavage sites 2+3 mutagenesis forward | 5'-GATAGT <u>GGAACAAGG</u> AAATTCGTA-3'                         |
| Hau-bmp5-8 cleavage sites 2+3 mutagenesis reverse | 5'-CTTGCC <u>CACTTTCC</u> GGTTTTGAA-3'                          |
| pCS107 Hau-bmp5-8 <sup>FLAG+HA</sup>              |                                                                 |
| Hau-bmp5-8 FLAG insertion forward                 | 5'- <u>GACGATAAGAAGAAACCAA</u> ACTATCTTACCAGACTCTGTCAAC-3'      |
| Hau-bmp5-8 FLAG insertion reverse                 | 5'- <u>GTCATCCTTGTAAATCGT</u> ACGAATTTCTCTTGTTCGGACTATCCTTGC-3' |
| Hau-bmp5-8 HA insertion forward                   | 5'- <u>GATGTTCCAGATTACGCT</u> CAGCAGTATTCAAATGACGGCGGC-3'       |
| Hau-bmp5-8 HA insertion reverse                   | 5'- <u>GTATGGGTATTTCGTGATGGT</u> GATGTTGAGGTGGAG-3'             |
| pCS107 Hau-bmp5-8 <sup>GFP</sup>                  |                                                                 |
| Hau-bmp5-8 NheI-SacI insertion forward            | 5'- <u>AGAGCTCTACAAGAAGAAACCAA</u> ACTATCTT-3'                  |
| Hau-bmp5-8 NheI-SacI insertion reverse            | 5'- <u>GGCTAGCCGAATTTCTCTTGT</u> TCCGACTATC-3'                  |
| GFP forward + NheI site                           | 5'- <u>GGCTAGCATGGT</u> GAGCAAGGGCGAGGAG-3'                     |
| GFP reverse + SacI site                           | 5'- <u>AGAGCTCCTTGTACAGCTCGT</u> CCATGCCG-3'                    |
| pMiEF1P Hau-furin1.1                              |                                                                 |
| Hau-furin1.1 forward + ClaI site                  | GAAC <u>ATCGATATGAATTTT</u> ATGATGATCATTTGCTACCT                |
| Hau-furin1.1 reverse + XhoI site                  | GAAC <u>TCGAGAAATGCTAATAAATTT</u> AAACAATAAAGATCATAATGA         |
